# Supplementary figures and images for: Signed and unsigned reward prediction errors dynamically enhance learning and memory
Source: eLife journal article supplement (doi:10.7554/elife.61077), 2021-03-02

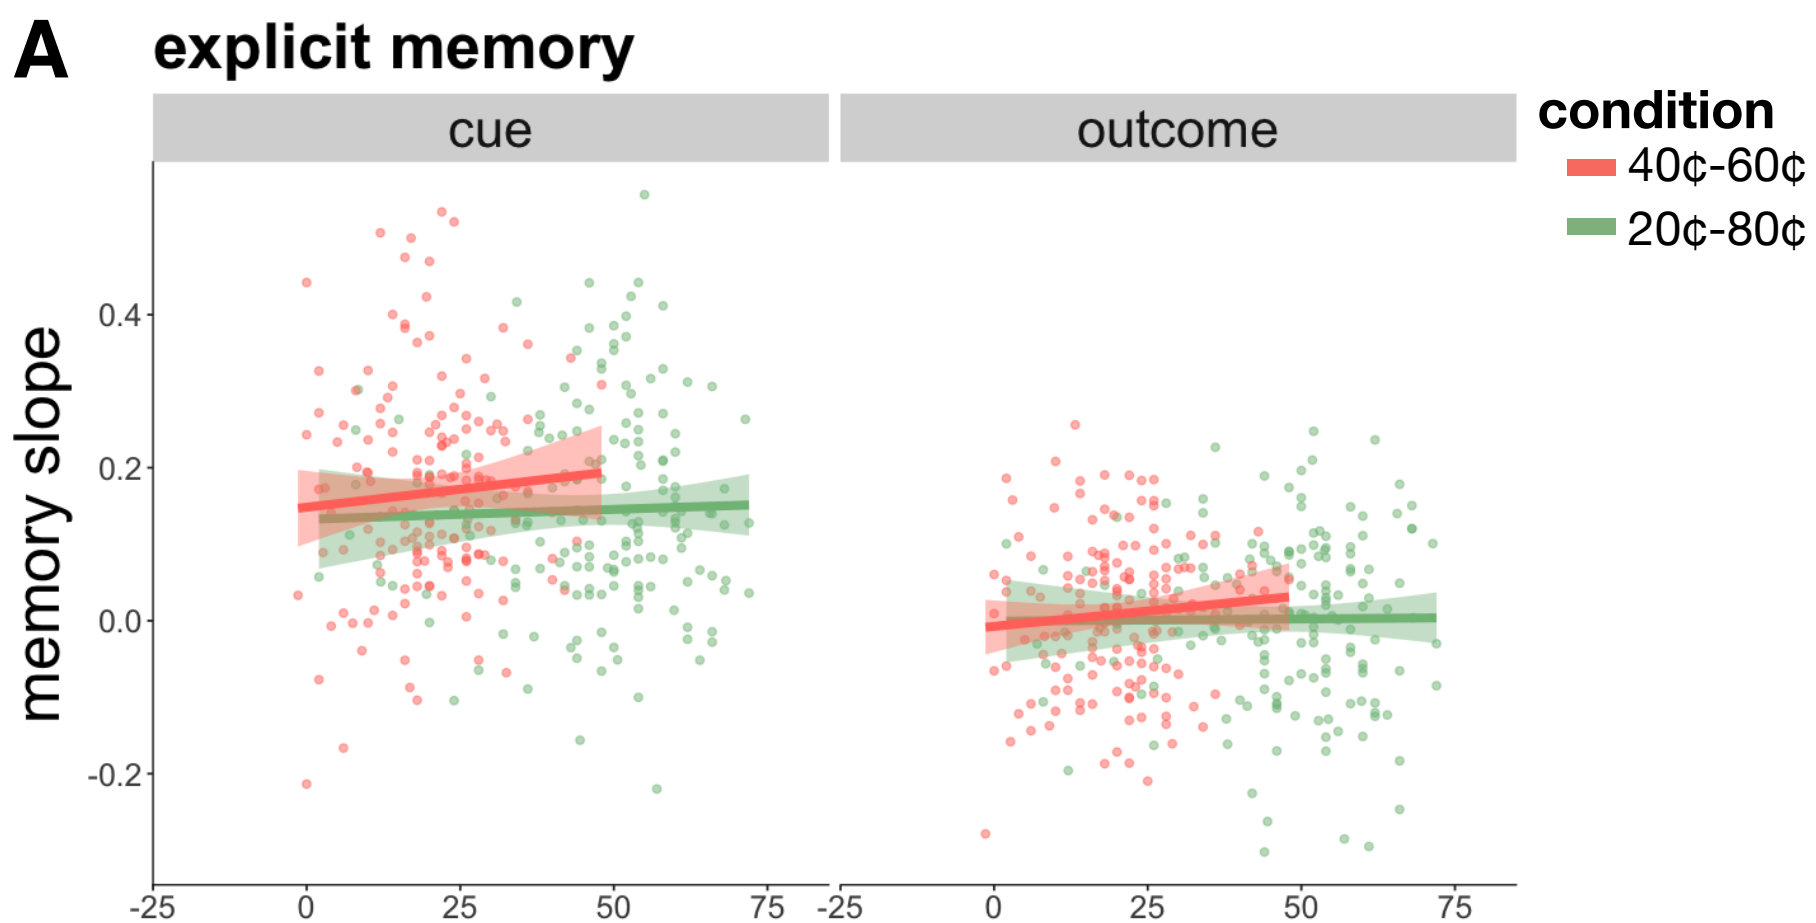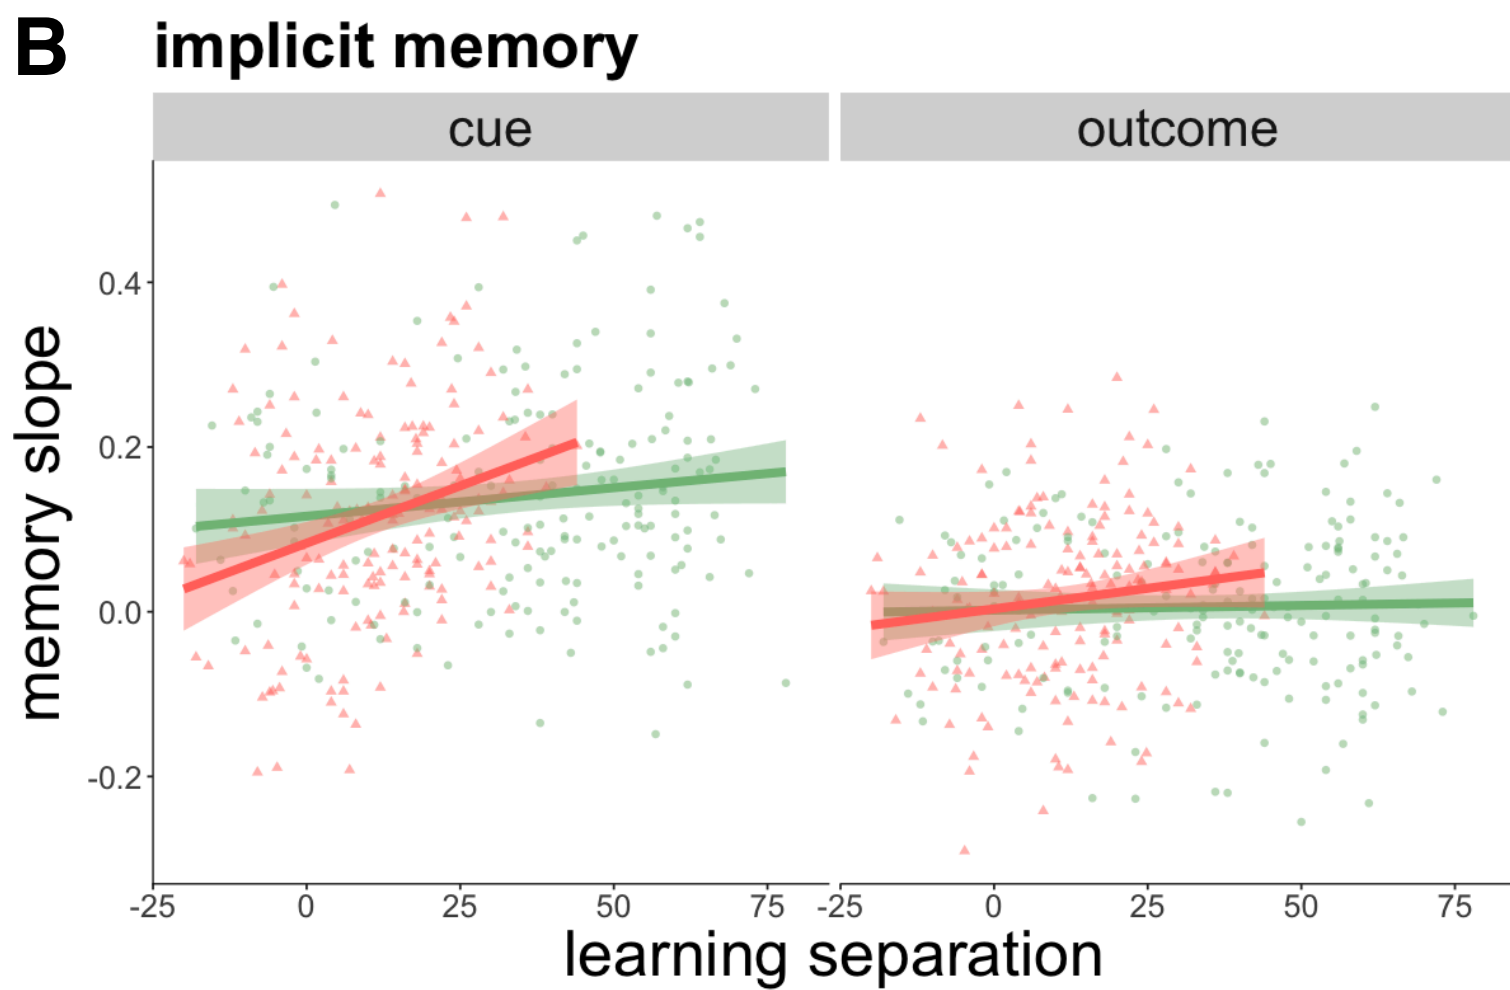

Supplement: supp [file elife-61077-supp-v1.zip]

**A**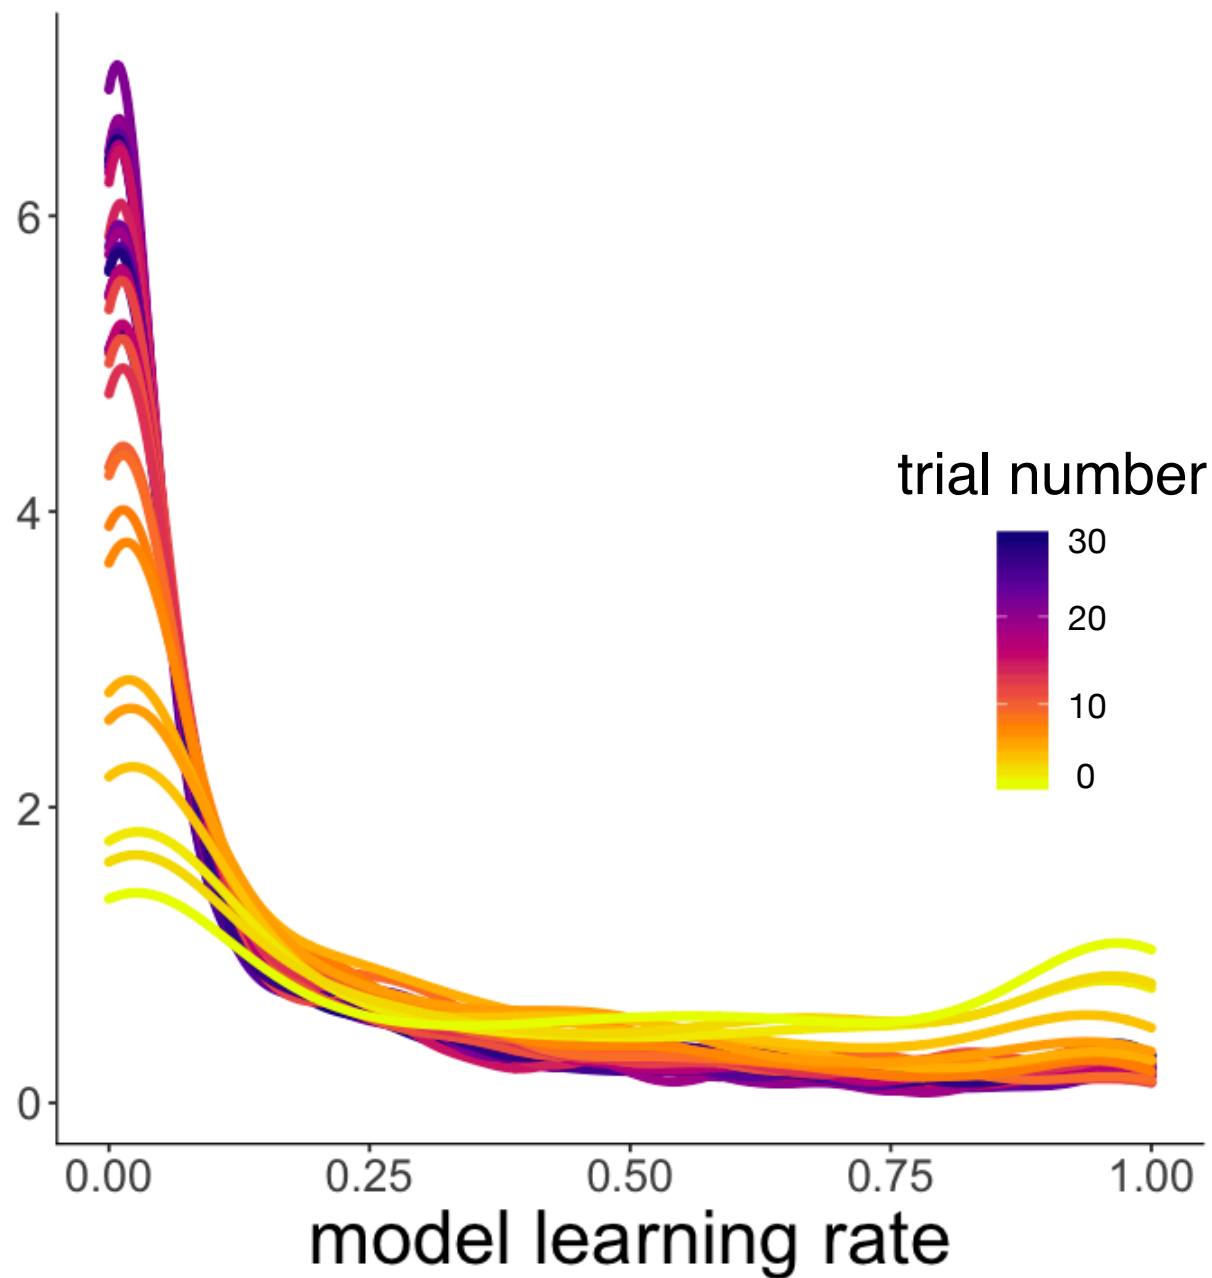**B**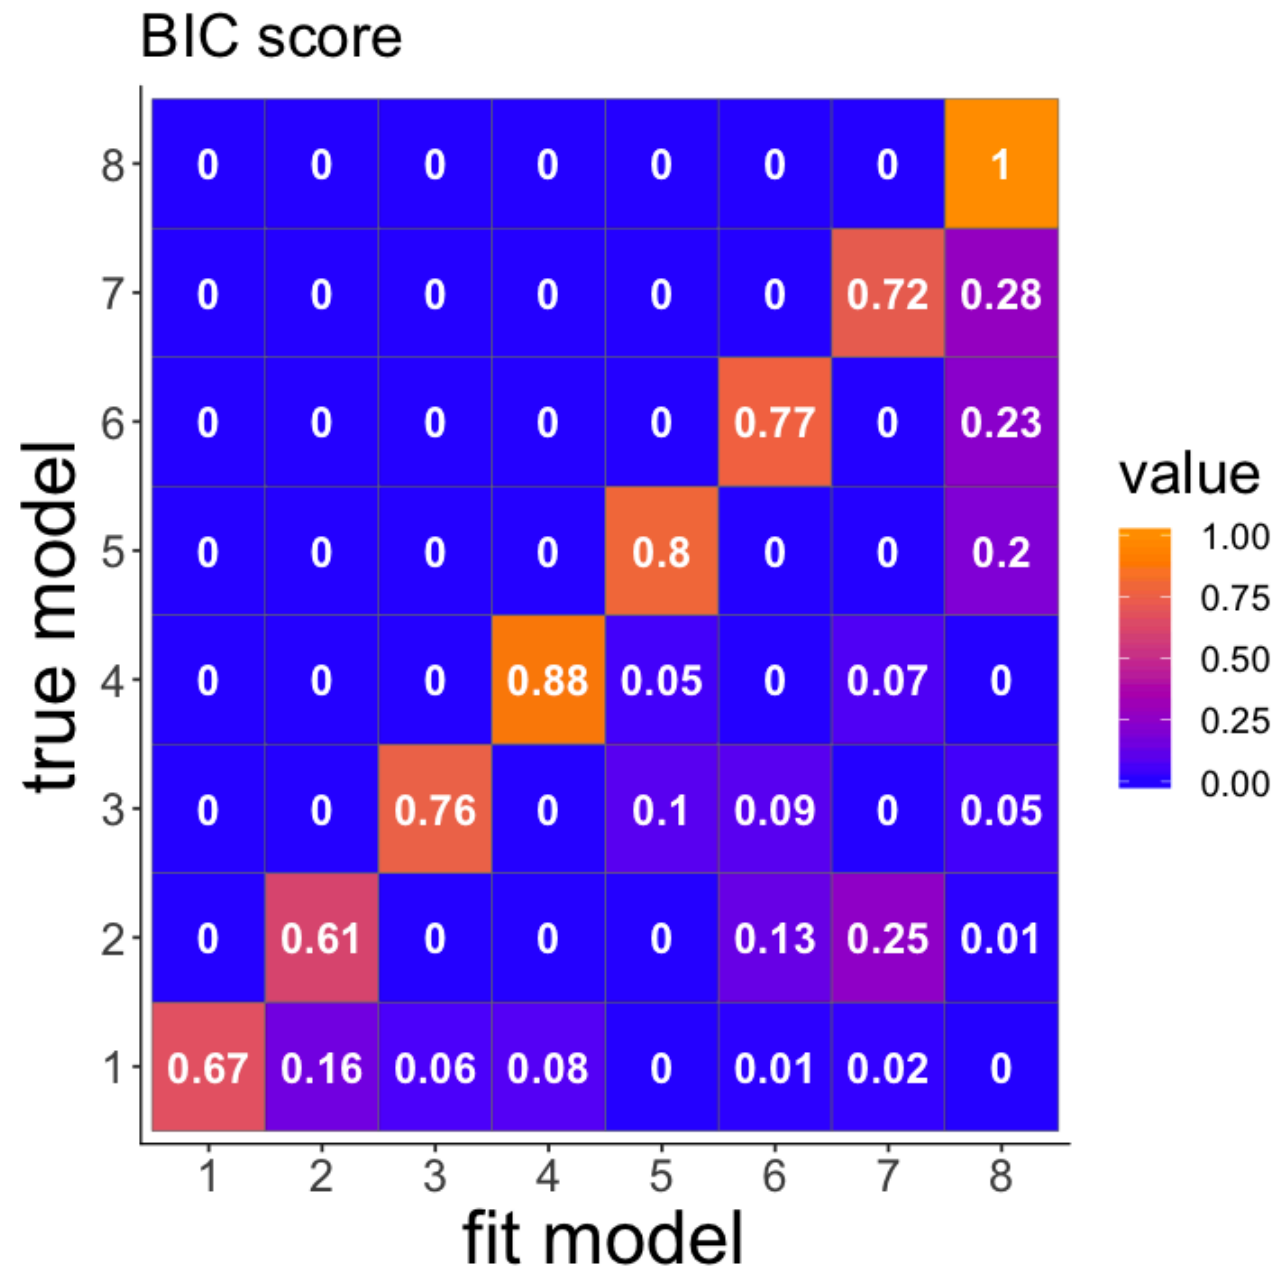

Supplement: supp [file elife-61077-supp-v1.zip]

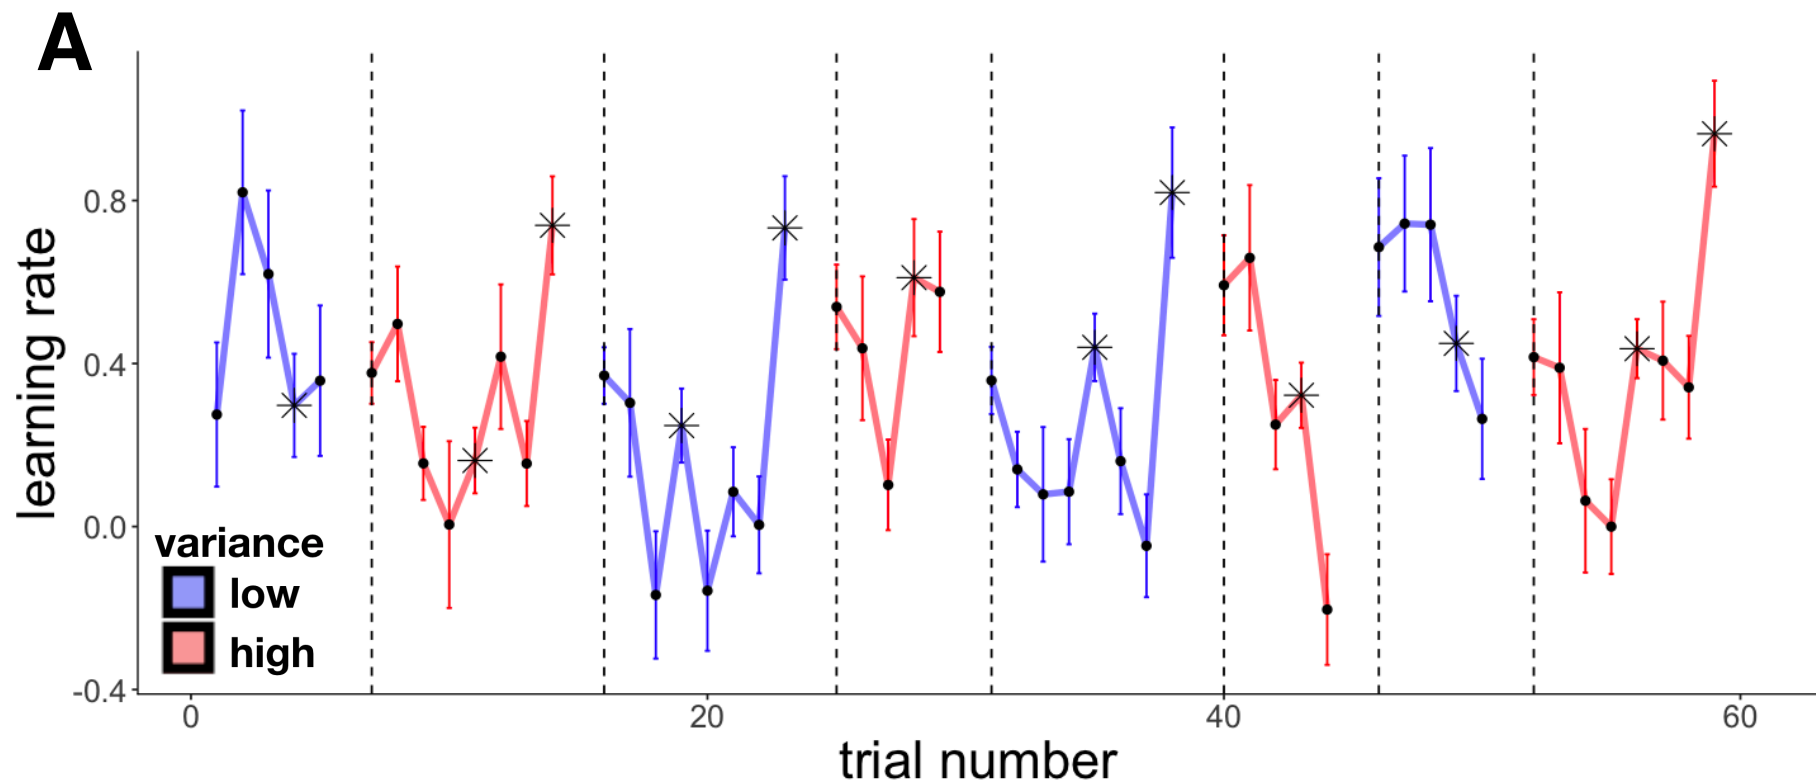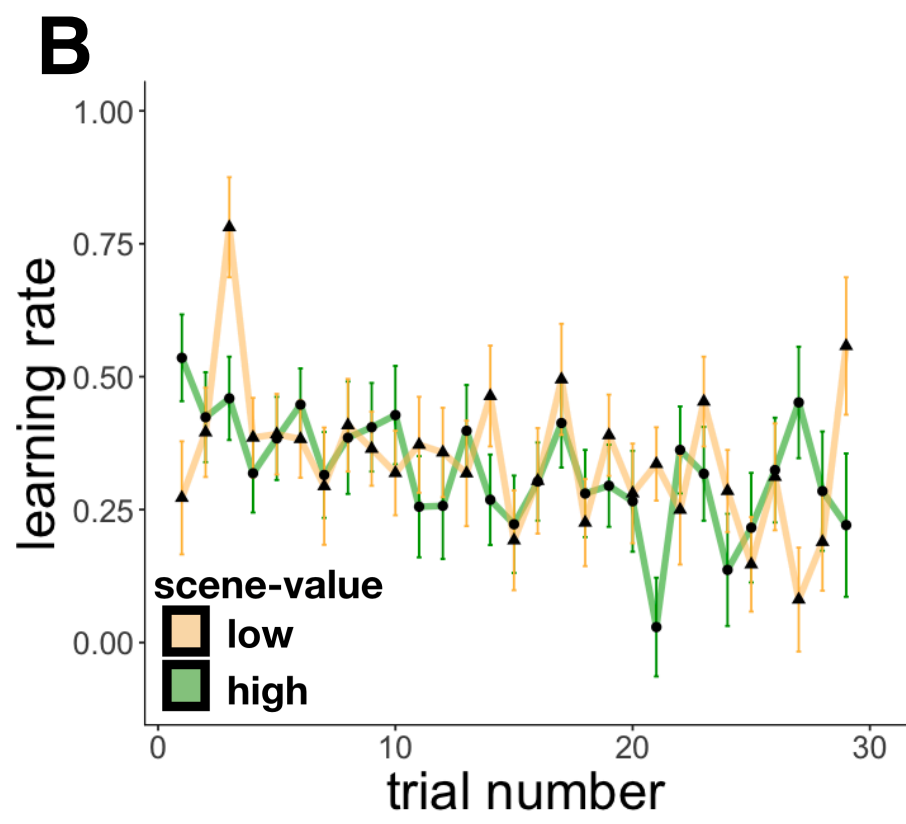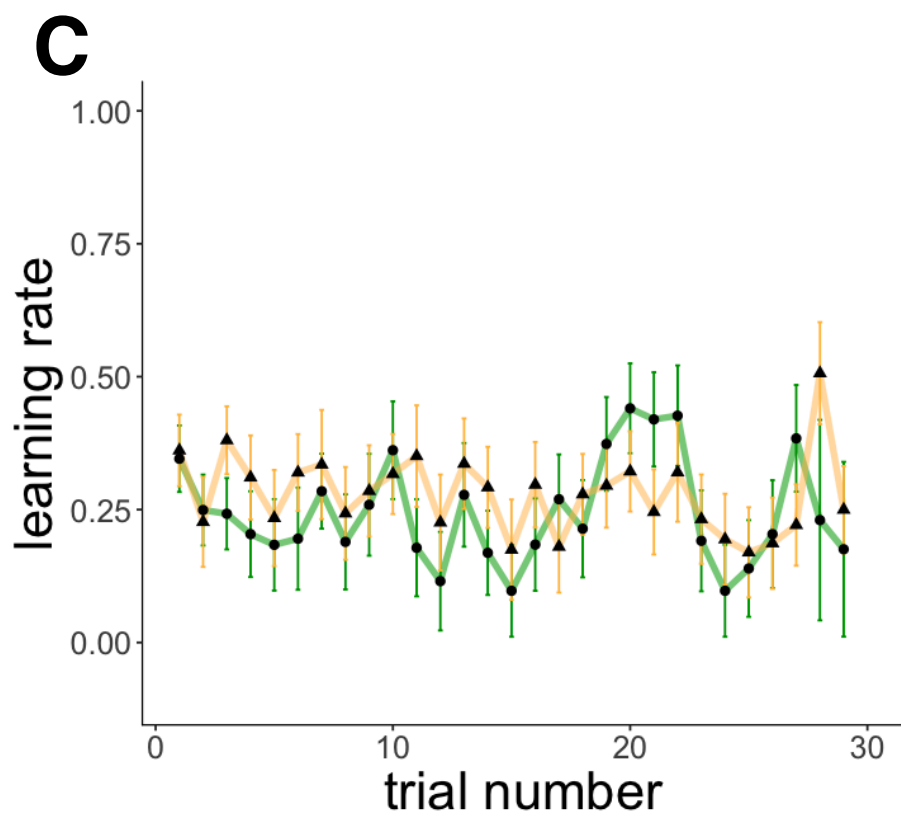

Supplement: supp [file elife-61077-supp-v1.zip]
